# Supplementary material
Source: publisher site journal article supplement (http://kjim.org/upload/media/kjim-2022-035-suppl2.pdf)
Supplement: Supplementary file 1 [file kjim-2022-035-suppl2.pdf]

**Supplementary Table 2. Univariate and multivariate logistic regression analyses for response prediction**

| Variable                                          | Univariate                |         | Multivariate              |         |
|---------------------------------------------------|---------------------------|---------|---------------------------|---------|
|                                                   | OR (95% CI)               | P value | OR (95% CI)               | P value |
| Age at BDP initiation, yr                         |                           |         |                           |         |
| > 40 yr                                           | 2.562 (1.136–5.780)       | 0.023   | 2.011 (0.649–6.237)       | 0.226   |
| Sex                                               |                           |         |                           |         |
| Male/female                                       | 0.672 (0.304–1.486)       | 0.326   |                           |         |
| Disease duration (median), yr                     | 1.024 (0.969–1.082)       | 0.395   |                           |         |
| Disease extent at BDP initiation (ref. proctitis) |                           |         |                           |         |
| Left-sided colitis                                | 0.731 (0.210–2.540)       | 0.622   |                           |         |
| Extensive                                         | 0.611 (0.175–2.132)       | 0.440   |                           |         |
| Initial stool frequency subscore (ref. score 3)   |                           |         |                           |         |
| Score 0                                           | 8.000 (0.711–90.001)      | 0.092   |                           |         |
| Score 1                                           | 1.541 (0.446–5.326)       | 0.495   |                           |         |
| Score 2                                           | 4.000 (1.000–15.994)      | 0.050   |                           |         |
| Initial rectal bleeding subscore (ref. score 3)   |                           |         |                           |         |
| Score 0                                           | 123.000 (12.534–1207.083) | < 0.001 | 119.489 (12.019–1187.896) | < 0.001 |
| Score 1                                           | 10.286 (1.162–91.068)     | 0.036   | 9.666 (1.078–86.633)      | 0.043   |
| Score 2                                           | 1.714 (0.138–21.333)      | 0.675   | 1.923 (0.151–24.434)      | 0.614   |
| Concomitant drugs (ref. no drug)                  |                           |         |                           |         |
| IMM or biologic agent                             | 0.927 (0.358–2.400)       | 0.876   |                           |         |
| Elevated CRP (> 0.6 mg/dL)                        | 0.480 (0.152–1.517)       | 0.211   |                           |         |
| Elevated ESR (> 9 mm/hr)                          | 0.699 (0.277–1.763)       | 0.447   |                           |         |

OR, odds ratio; CI, confidence interval; BDP, beclomethasone dipropionate; IMM, immunomodulator; CRP, C-reactive protein; ESR, erythrocyte sedimentation rate.
